# Supplementary material for: Zn-containing porphyrin as a biomimetic light-harvesting molecule for biocatalyzed artificial photosynthesis
Source: Royal Society of Chemistry journal article supplement (doi:10.1039/c1cc12222c), 2011-01-01
Supplement: c1cc12222c.pdf [file c1cc12222c.pdf]

## Electronic Supplementary Information

# Zn-Containing Porphyrin as a Biomimetic Light-Harvesting Molecule for Biocatalyzed Artificial Photosynthesis

Jae Hong Kim, Sahng Ha Lee, Joon Seok Lee, Minah Lee and Chan Beum Park

*Department of Materials Science and Engineering, Korea Advanced Institute of Science and Technology (KAIST), 335 Science Road, Daejeon 305-701, Republic of Korea*

## MATERIALS & METHODS

*Materials:* Tetrakis(4-sulfonatophenyl)porphyrin (TPPS), Zn(II)TPPS, Mn(III)TPPS, Tetrakis(4-carboxyphenyl)porphyrin (TPPC), Zn(II)TPPC, and Mn(III)TPPC were purchased from Frontier Scientific, Inc (Logan, UT). NAD<sup>+</sup>, triethanolamine (TEOA),  $\alpha$ -ketoglutarate, ammonium sulfate, and glutamate dehydrogenase (GDH) were purchased from Sigma-Aldrich (St. Louis, MO). All chemicals were used without further purification. **M** was synthesized according to the literature (Lee et al., 2009).

*Photochemical NADH regeneration using various porphyrins:* The NADH regeneration was performed in a quartz reactor in an Ar atmosphere at room temperature. 1 mM NAD<sup>+</sup> and 0.5 mM **M** were dissolved in a degassed phosphate buffer (100 mM, pH 7.5) containing 15 w/v% TEOA. Under Ar atmosphere, degassed phosphate buffer can prevent the oxidation of NADH to NAD<sup>+</sup> (Donk and Zhao, 2003). We then dissolved 0.5 mM porphyrin in the reaction solution, which was then exposed to the light from a 450 W Xe research arc lamp source (62 mW cm<sup>-2</sup>) with a 400 nm cut-off filter. The concentration of NADH was measured by analyzing its absorbance at 340 nm with a spectrophotometer (Biospec Mini, Shimadzu Co., Japan).

*Biocatalytic L-glutamate synthesis coupled with NADH regeneration using various porphyrins:* For the photosynthesis of L-glutamate, we conducted the reaction with 1 mM NAD<sup>+</sup>, 0.5 M M, 1 mM  $\alpha$ -ketoglutarate, 100 mM ammonium sulfate, and 40 U GDH, based on a degassed phosphate buffer (100 mM, pH 7.5) with 15 w/v% TEOA. To avoid any side reaction such as a reaction between  $\alpha$ -ketoglutarate and singlet oxygen produced by porphyrin (Jefford et al., 1976; Scalise & Durantini, 2004), 0.5 mM porphyrin was dissolved under Ar atmosphere in the reaction solution, which was then exposed to the light from the 450 W Xe research arc lamp source (62 mW cm<sup>-2</sup>) with a 400 nm cut-off filter. To quantitatively estimate the concentration of L-glutamate, high-performance liquid chromatography (LC-20A prominence, Shimadzu Co.,) equipped with an Inertsil C18 column (ODS-3V, length, 150 mm) was used. Samples were eluted by phosphoric acid (0.05%) with flow rate of 1.0 mL min<sup>-1</sup> detected at 214 nm.

*Characterization of the energetic relationship between porphyrins and M:* Spectrofluorometric experiments were performed with the RF-5301PC (Shimadzu Co., Japan). The emission spectra were measured under an excitation wavelength of 400 nm. A 3-electrode system was used to obtain a linear sweep voltammogram; a glassy carbon disk (working electrode), Ag/AgCl (reference electrode, 0.197 V versus normal hydrogen electrode), and a platinum wire (counter electrode) were connected to a multi channel potentiostat/galvanostat (WonATech, Model WMPG1000, Korea) with a 100 mV s<sup>-1</sup> scan rate. Fourier-transform infrared (FT-IR) spectra of samples were collected using a JASCO FT-IR-6100 spectrometer (JASCO Inc., Tokyo, Japan) at a resolution of 2 cm<sup>-1</sup> under vacuum.

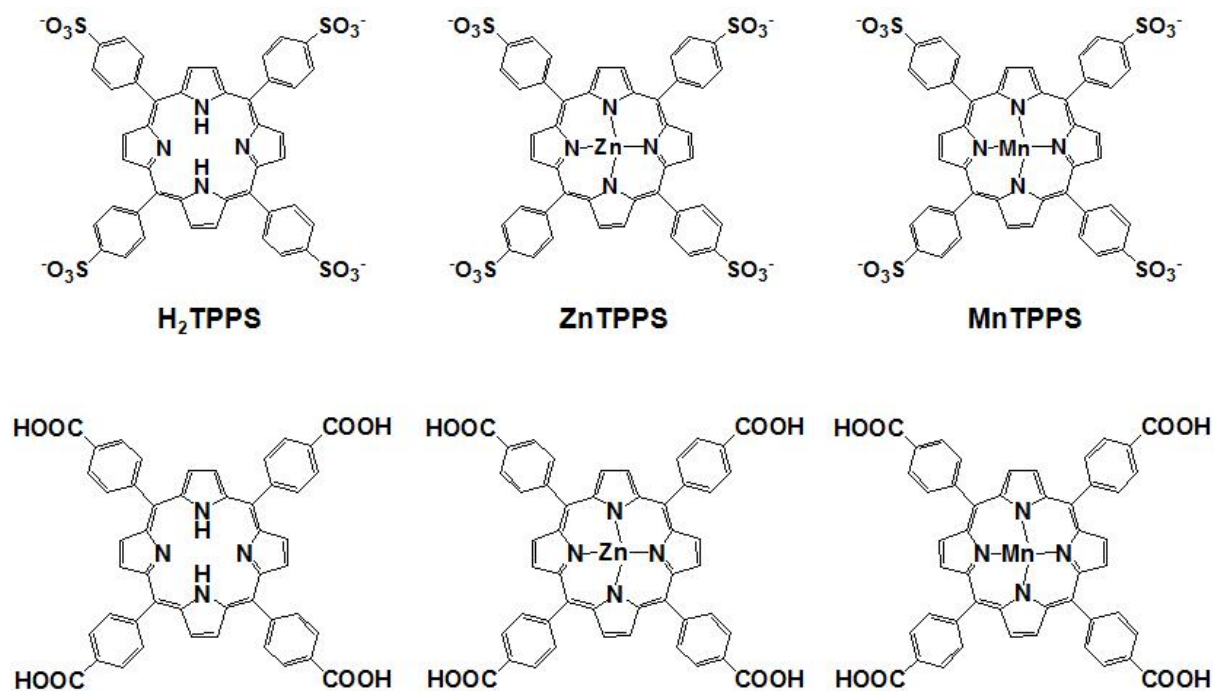

**Figure S1.** Molecular structure of porphyrin molecules having different metal insertion sites (e.g., no metal, Zn, or Mn) and functional ligands (e.g., sulfonato or carboxyl group).

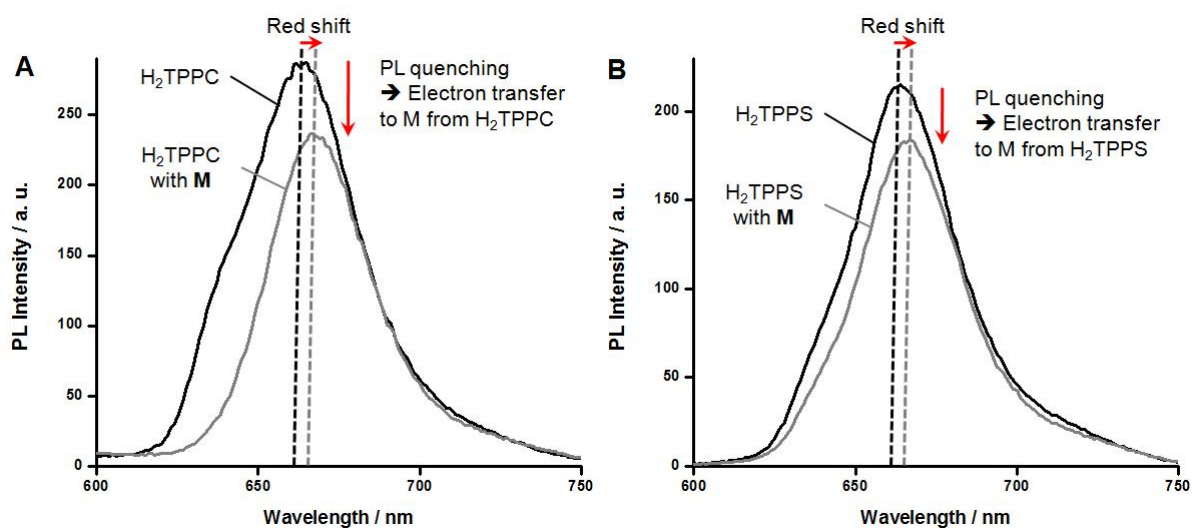

**Figure S2.** The change in emission spectrum for (A) H<sub>2</sub>TPPC and (B) H<sub>2</sub>TPPS without M (black line) and with 0.125 mM M (gray line).

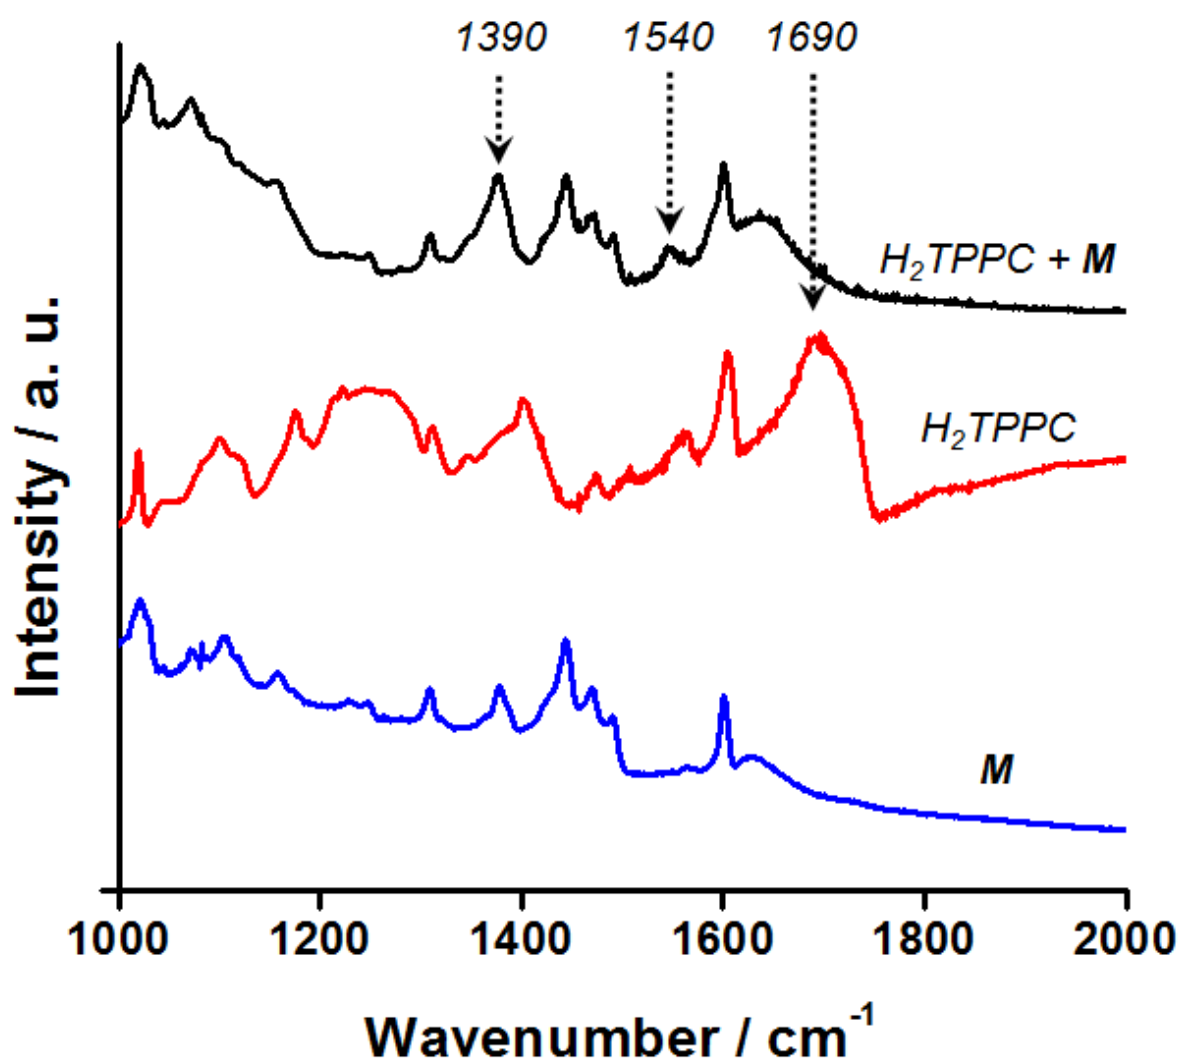

**Figure S3.** FT-IR spectra of  $H_2TPPC$ ,  $M$ , and  $H_2TPPC + M$ . The  $\nu(C=O)$  and  $\nu(C-O)$  stretching modes at  $1690\text{ cm}^{-1}$  of  $H_2TPPC$  was significantly suppressed by the addition of  $M$ . At the same time, the  $\nu(CO_2^-)$  stretch in the mixture was higher than  $M$  without  $H_2TPPC$  at  $1390\text{ cm}^{-1}$ . It suggests that  $H_2TPPC$  was consistent with chelating or bidentate binding to the  $M$  like  $H_2TPPC-TiO_2$  composites. (Rochford et al., 2007)

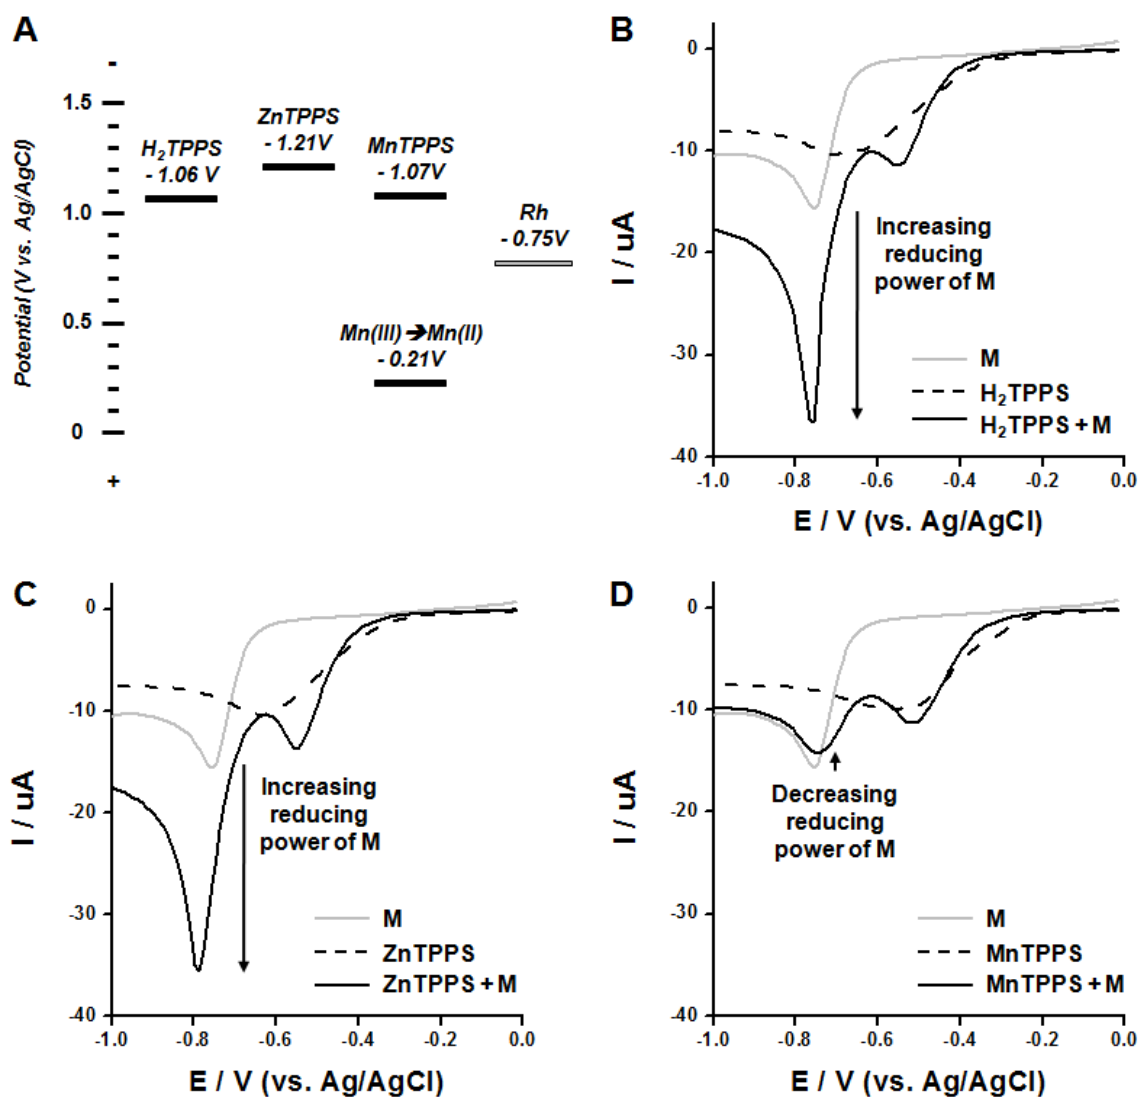

**Figure S3.** Energetic relationship between the TPPS group and M. (A) Reduction potential of porphyrin ( $H_2TPPS$ ,  $ZnTPPS$ ,  $MnTPPS$ ) and M. Linear sweep voltammograms for M with or without (B)  $H_2TPPS$ , (C)  $ZnTPPS$ , and (D)  $MnTPPS$ . The potential was scanned at  $100 \text{ mV s}^{-1}$ .

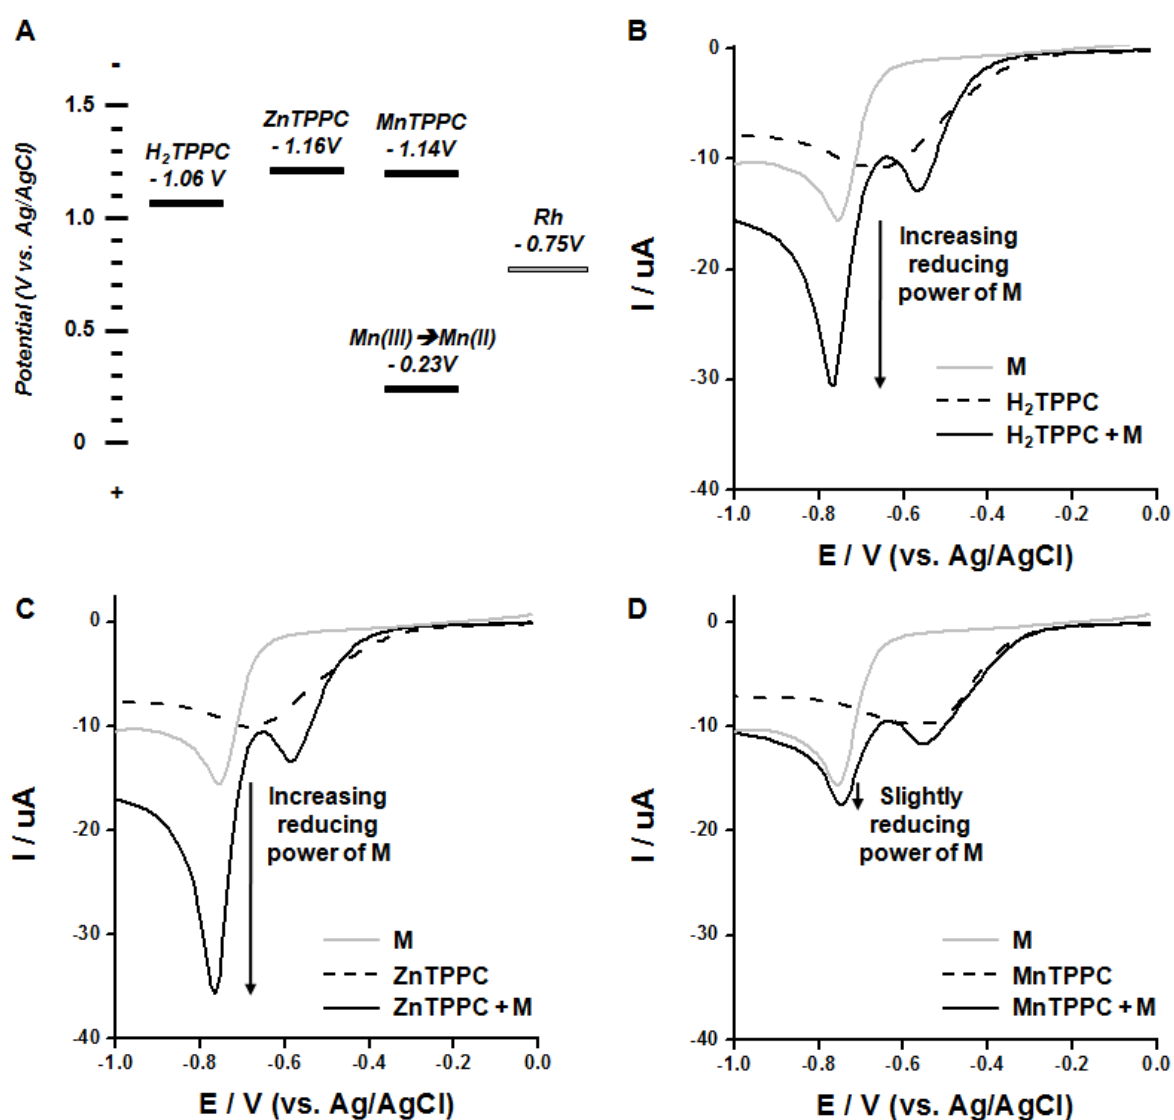

**Figure S4.** Energetic relationship between the TPPC group and M. (A) Reduction potential of porphyrin ( $H_2TPPC$ ,  $ZnTPPC$ ,  $MnTPPC$ ) and M. Linear sweep voltammograms for M with or without (B)  $H_2TPPC$ , (C)  $ZnTPPC$ , and (D)  $MnTPPC$ . The potential was scanned at  $100 \text{ mV s}^{-1}$ .

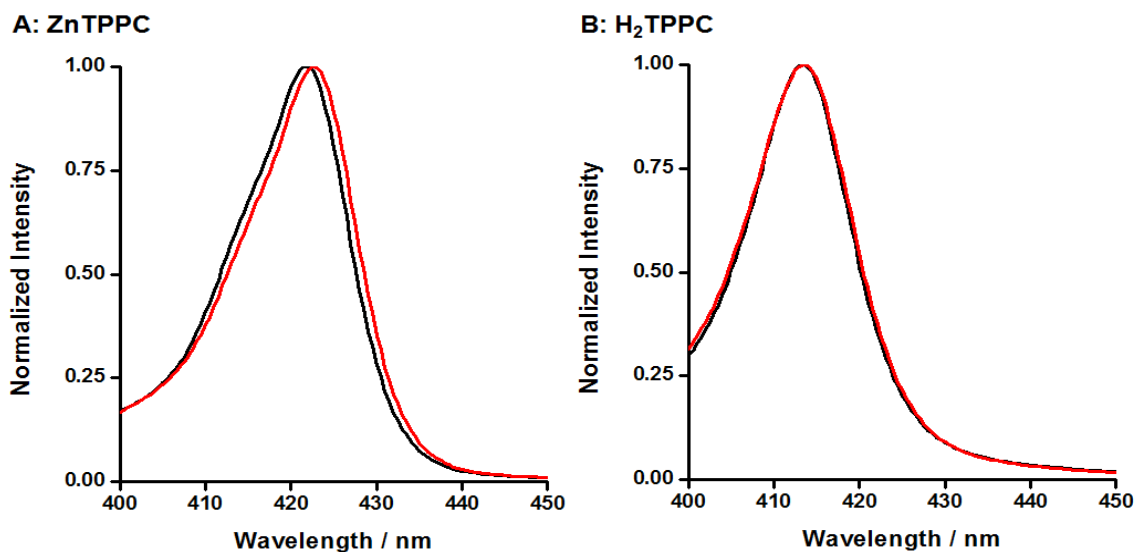

**Figure S5.** Absorbance spectrum for (A) 0.1  $\mu\text{M}$  ZnTPPC and (B) 0.1  $\mu\text{M}$  H<sub>2</sub>TPPC with (red line) or without (black line) 0.1 mM TEOA.

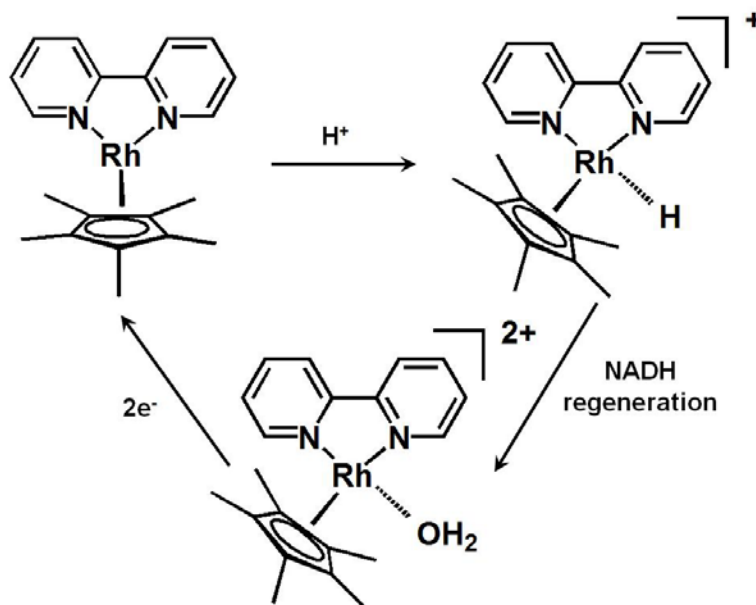

**Figure S6.** Molecular structures of three different electrochemical states of **M** and indirect NADH regeneration by **M** (Stekhan et al., 1991; Lo et al., 2001).

### References for Electronic Supplementary Information

- Donk, W. A. v. d.; Zhao, H.; *Curr. Opin. Biotech.* **2003**, 14, 421-426.  
Scalise, I.; Duranitini, N.; *J. Photochem. Photobiol. A: Chem.* **2004**, 162, 105-113.  
Jefford, C. W.; Boschung, A. F.; Bolsman, T. A. B. M.; Moriaty, R. M.; Melnick, B.; *J. Am. Chem. Soc.* **1976**, 98, 1017-1018.  
Rochford, J.; Chu, D.; Hagfeldt, A.; Galoppini, E.; *J. Am. Chem. Soc.* **2007**, 129, 4655-4665.

Lee, S. H.; Nam, D. H.; Kim, J. H.; Baeg, J-O.; Park, C. B.; *ChemBioChem* **2009**, *10*, 1621-1624.

Steckhan, E.; Herrmann, S.; Ruppert, R.; Dietz, E.; Frede, M.; Spika, E.; *Organometallics* **1991**, *10*, 1568-1577.

Lo, H. C.; Leiva, C.; Buriez, O.; Kerr, J. B.; Olmstead, M.; Fish, R. H.; *Inorg. Chem.* **2001**, *40*, 6705-6716.
